# Supplementary material for: Dietary patterns and association with Iron deficiency among children and adolescents aged 9–17 years in rural Guangzhou, China: a cross-sectional study
Source: Frontiers journal article supplement (doi:10.3389/fnut.2024.1443849), 2024-09-02
Supplement: Image_1.pdf [file Image_1.pdf]

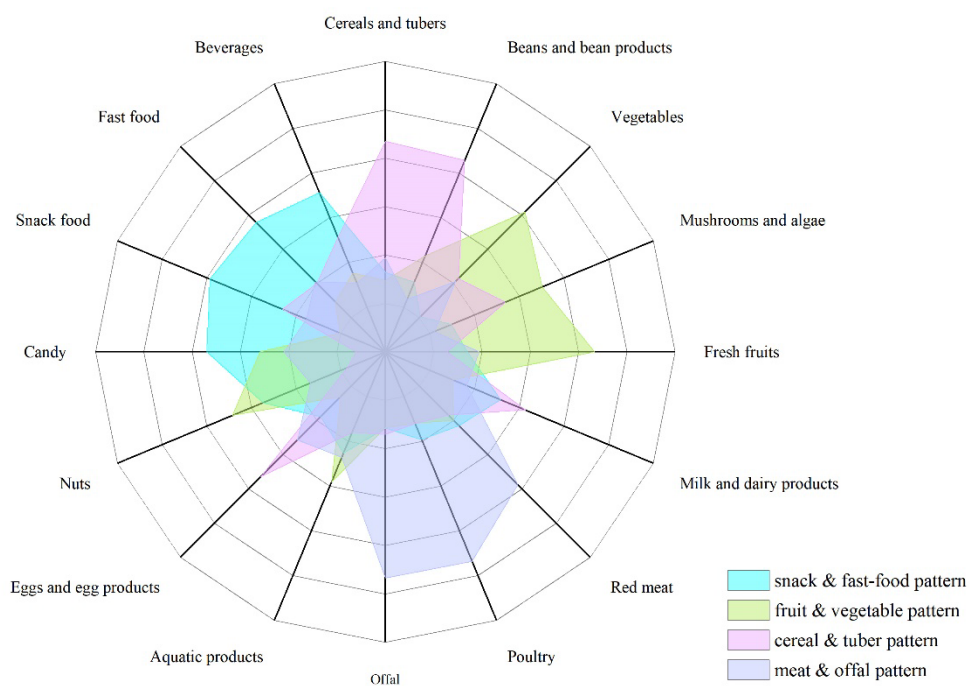

**Supplementary figure 1. Radar chart of different dietary patterns obtained by factor analysis**
